# Supplementary material
Source: PubMed Central journal article supplement (PMC2766605)
Supplement: NIHMS125250-supplement-table.pdf [file NIHMS125250-supplement-table.pdf]

**Table S1 PCR Analysis of Peripheral Tissues, Serum, and CSF from Monkeys Infused with AAV2-hAADC**  
Copies hAADC/ $\mu$ g monkey DNA

| Animal # | AAV2 Vector | Dose (Units) | Day 1 Serum       | Day 1 CSF         | Serum             | CSF               | Heart            | Liver | Salivary Gland | Lung             | Kidney | Spleen                                    | Thymus           | Ovary or Testes  |
|----------|-------------|--------------|-------------------|-------------------|-------------------|-------------------|------------------|-------|----------------|------------------|--------|-------------------------------------------|------------------|------------------|
| RQ3714   | hAADC       | 500          | NEG <sup>a</sup>  | NEG <sup>ab</sup> | NEG <sup>ab</sup> | NEG <sup>ab</sup> | NEG              | NEG   | NEG            | NEG              | NEG    | <b>75 <math>\pm</math> 15</b>             | NEG              | NEG              |
| RQ3702   | hAADC       | 500          | NEG <sup>ab</sup> | NEG <sup>ab</sup> | NEG <sup>ab</sup> | NEG <sup>ab</sup> | NEG              | NEG   | NEG            | NEG              | NEG    | <b>60 <math>\pm</math> 21<sup>b</sup></b> | NEG              | NEG              |
| RQ3746   | hAADC       | 170          | NEG <sup>ab</sup> | NEG <sup>ab</sup> | NEG <sup>ab</sup> | NEG <sup>ab</sup> | NEG              | NEG   | NEG            | NEG <sup>b</sup> | NEG    | <b>218 <math>\pm</math> 34</b>            | NEG              | NEG              |
| RQ3715   | hAADC       | 170          | NEG <sup>ab</sup> | NEG <sup>ab</sup> | NEG <sup>ab</sup> | NEG <sup>ab</sup> | NEG              | NEG   | NEG            | NEG <sup>b</sup> | NEG    | <b>50 <math>\pm</math> 12</b>             | NEG              | NEG              |
| RQ3723   | hAADC       | 55           | NEG <sup>a</sup>  | NEG <sup>ab</sup> | NEG <sup>ab</sup> | NEG <sup>ab</sup> | NEG <sup>b</sup> | NEG   | NEG            | NEG              | NEG    | NEG                                       | NEG              | NEG              |
| RQ3672   | hAADC       | 55           | NEG <sup>ab</sup> | NEG <sup>ab</sup> | NEG <sup>ab</sup> | NEG <sup>ab</sup> | NEG              | NEG   | NEG            | NEG              | NEG    | NEG                                       | NEG <sup>a</sup> | NEG <sup>b</sup> |
| RQ3719   | hAADC       | 18           | NEG <sup>a</sup>  | NEG <sup>ab</sup> | NEG <sup>a</sup>  | NEG <sup>ab</sup> | NEG              | NEG   | NEG            | NEG              | NEG    | NEG                                       | NEG              | NEG              |
| RQ3840   | hAADC       | 18           | NS                | NEG <sup>ab</sup> | NEG <sup>ab</sup> | NEG <sup>ab</sup> | NEG              | NEG   | NEG            | NEG <sup>b</sup> | NEG    | NEG <sup>b</sup>                          | NEG              | NEG              |
| RQ3811   | hAADC       | 6            | NEG <sup>ab</sup> | NEG <sup>a</sup>  | NEG <sup>ab</sup> | NEG <sup>ab</sup> | NEG              | NEG   | NEG            | NEG <sup>b</sup> | NEG    | NEG                                       | NEG              | NEG <sup>a</sup> |
| RQ3753   | hAADC       | 6            | NEG <sup>ab</sup> | NEG <sup>ab</sup> | NEG <sup>ab</sup> | NEG <sup>ab</sup> | NEG              | NEG   | NEG            | NEG              | NEG    | NEG                                       | NEG              | NEG              |
| RQ3703   | GFP         | 500          | NEG <sup>ab</sup> | NEG <sup>ab</sup> | NEG <sup>ab</sup> | NEG <sup>ab</sup> | NEG              | NEG   | NEG            | NEG              | NEG    | NEG                                       | NEG              | NEG              |
| RQ3821   | GFP         | 500          | NEG <sup>a</sup>  | NEG <sup>ab</sup> | NEG <sup>ab</sup> | NEG <sup>ab</sup> | NEG              | NEG   | NEG            | NEG <sup>b</sup> | NEG    | NEG                                       | NEG              | NEG              |

Immediately prior to infusion with AAV2-hAADC, serum and CSF were collected as baseline samples for PCR analysis (Day 1). Six months after vector infusion, necropsies were performed and PCR analysis was used to quantitate hAADC DNA in serum, CSF, and eight peripheral tissues, as listed above. Doses shown are per hemisphere, and since monkeys were bilaterally treated, dose  $\times$  2 = total dose. Results shown in bold are average number of copies hAADC/ $\mu$ g monkey DNA  $\pm$  S.D. NS = no sample. NEG = Below lower limit of quantitation (<40 copies hAADC/ $\mu$ g genomic DNA). <sup>a</sup>Results are based on less than 2  $\mu$ g of analyzed DNA. <sup>b</sup>PCR efficiency (as defined by % recovery of target DNA spiked into the reaction) was <75%. Low PCR efficiency in serum and CSF was due to the acellular nature of the samples and possibly the presence of inhibitors.
