# Supplementary material
Source: PubMed Central journal article supplement (PMC2766605)

RQ3714

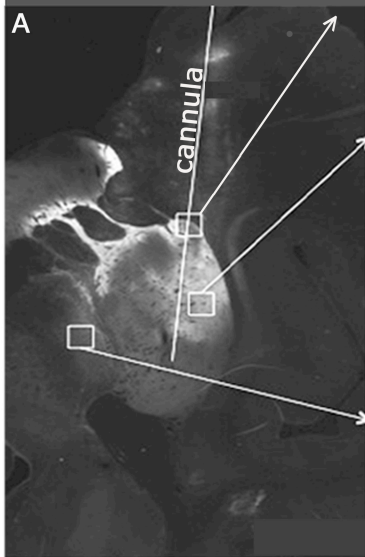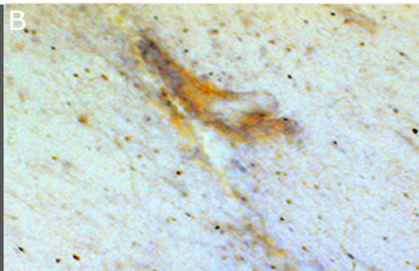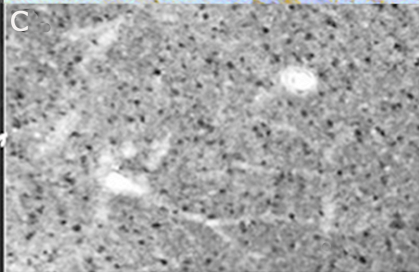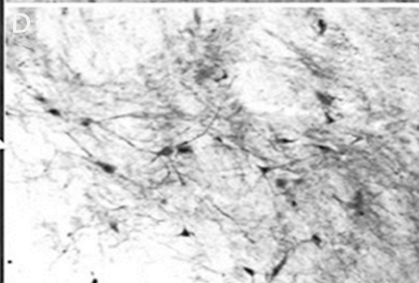

Supplement: NIHMS125250-supplement-S1.pdf [file NIHMS125250-supplement-S1.pdf]

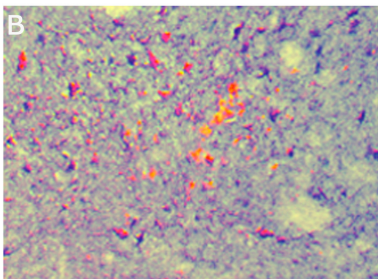

RQ3702

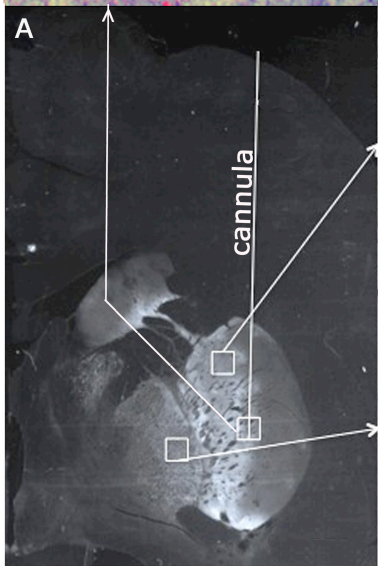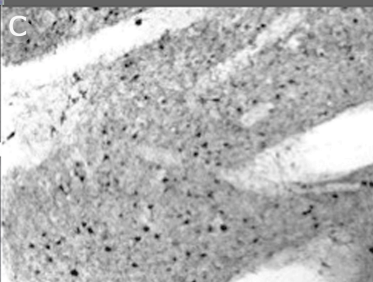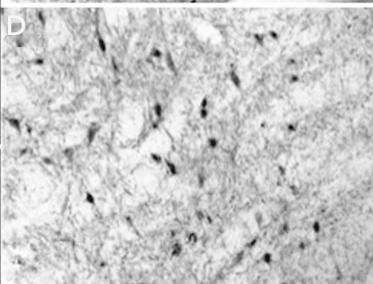

Supplement: NIHMS125250-supplement-S2.pdf [file NIHMS125250-supplement-S2.pdf]

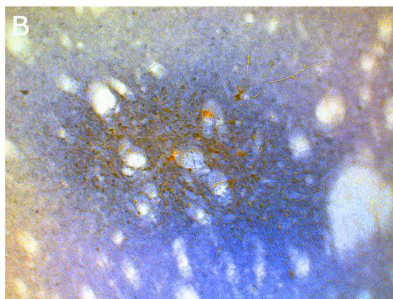

RQ3719

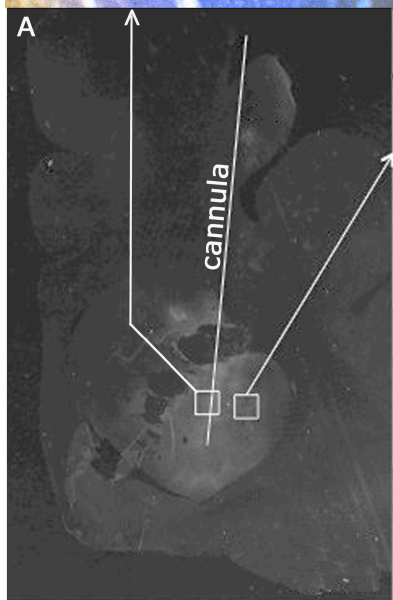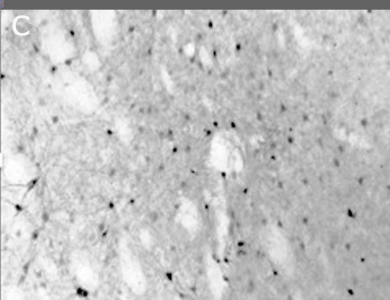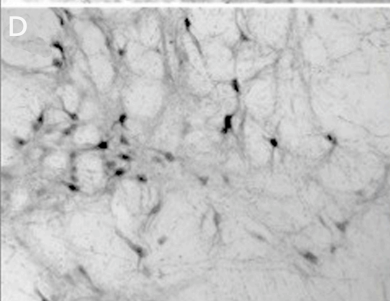

Supplement: NIHMS125250-supplement-S3.pdf [file NIHMS125250-supplement-S3.pdf]
